# Supplementary material for: Tunable Full-color Room Temperature Phosphorescence of Two Single-Component Zinc(II) Complexes
Source: Research Square preprint supplement (doi:10.21203/rs.3.rs-228343/v1), 2021-02-16
Supplement: Supplementary file 1 [file ef54399e9330d61e7a287349.docx]

Tunable Full-color Room Temperature Phosphorescence of Two Single-Component Zinc(II) Complexes

Ying Mu1,3, Zhong-Xin Liu1,3, Xiao-Yu Fang2, Song-De Han1, Jie Pan1, Qi Wei1, Jin-Hua Li1*, and Guo-Ming Wang1*

1College of Chemistry and Chemical Engineering, Qingdao University, Shandong 266071, P. R. China

2College of Chemistry, Beijing Normal University, Beijing Key Laboratory of Energy Conversion and Storage Mate-rials, Beijing 100875, P. R. China

3These authors contributed equally: Ying Mu, Zhong-Xin Liu

*E-mail: jinhuali1978@163.com; [gmwang_pub@163.com](mailto:gmwang_pub@163.com)


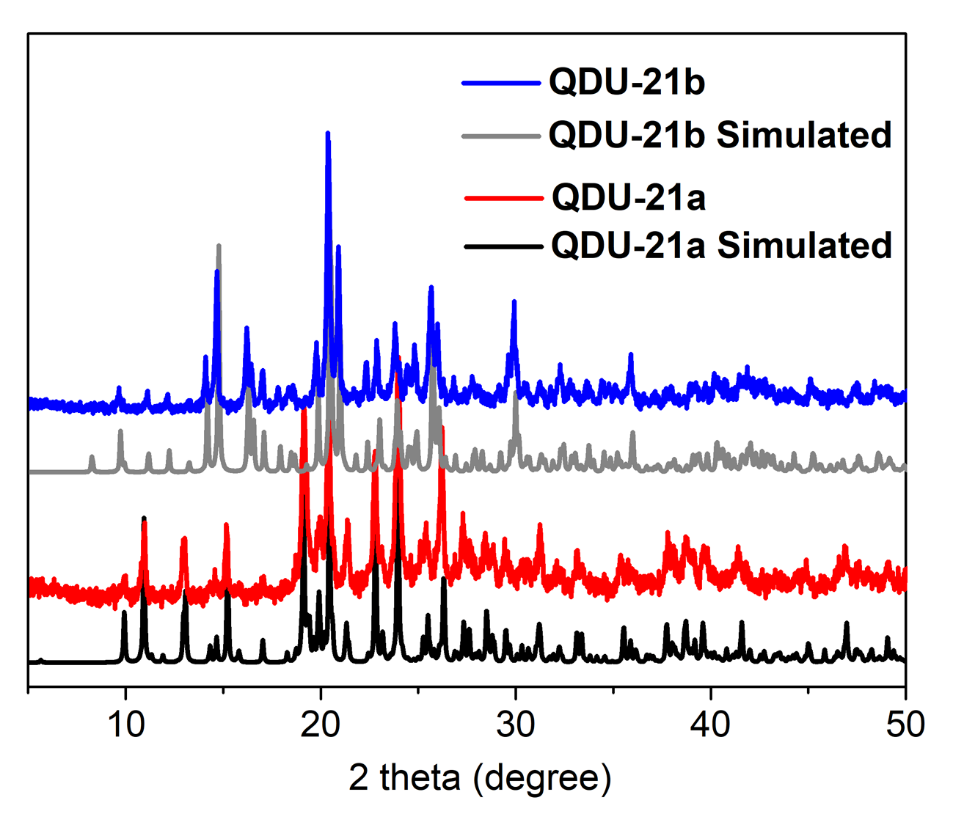


**Supplement Figure S1** The as-synthesized and simulated PXRD of QDU-21a and QDU-21b.


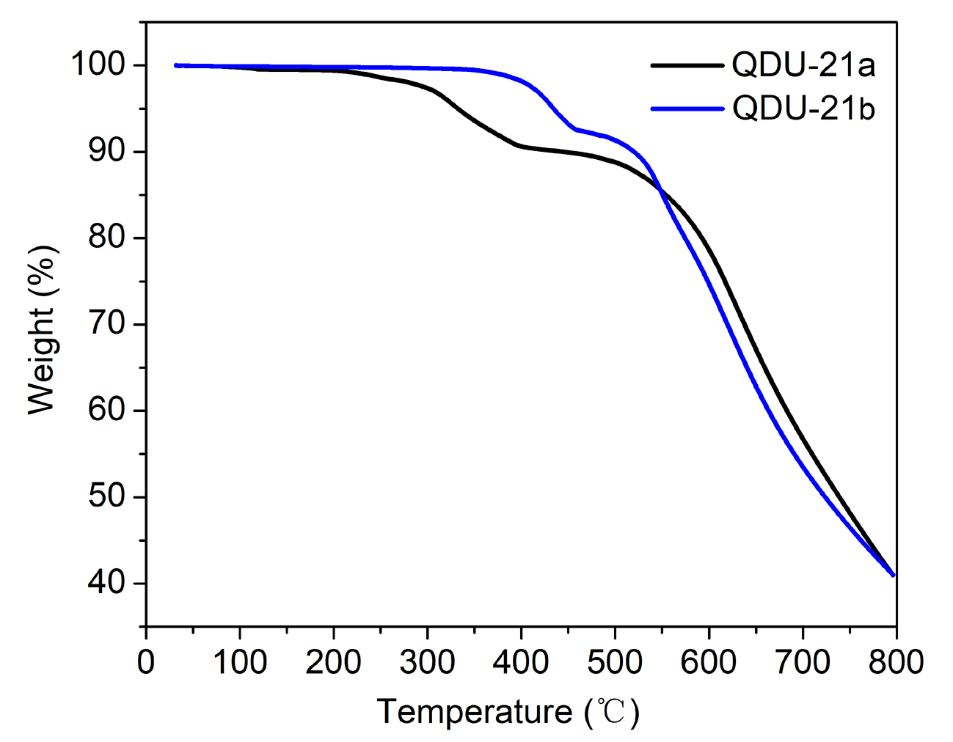


**Supplement Figure S2** TGA curves of QDU-21a and QDU-21b.


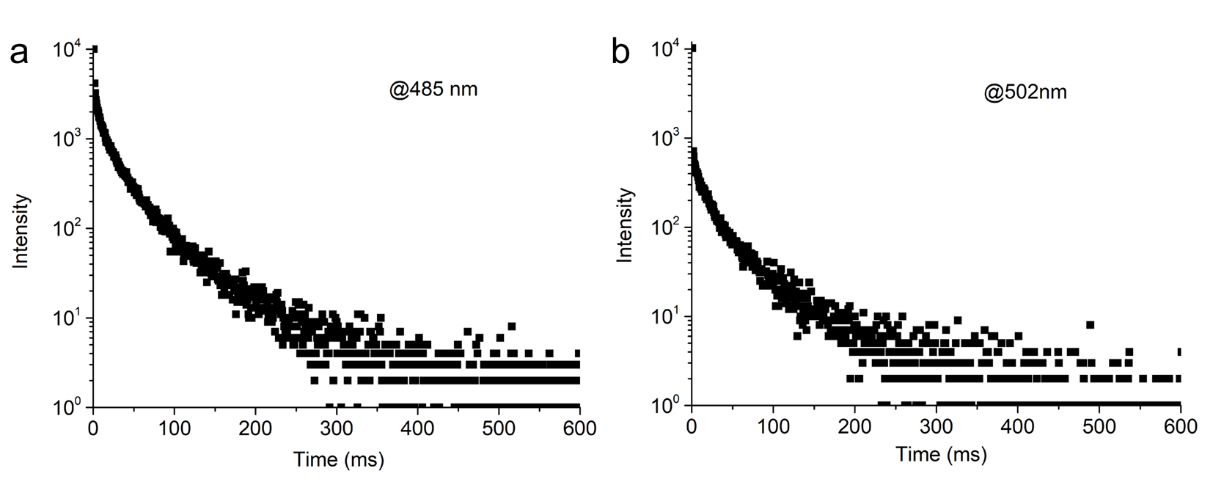


**Supplement Figure S3** Lifetime profiles of phosphorescence of QDU-21a monitored at wavelengths as indicated.





**Supplement Figure S4** Lifetime profiles of phosphorescence of QDU-21b monitored at wavelengths as indicated.





**Supplement Figure S5** Normalized phosphorescence excitation spectra of QDU-21a with emission at displayed wavelengths.





**Supplement Figure S6** Photoluminescence emission spectra of tib in DMF solution with excitation at displayed wavelengths at 77 K.


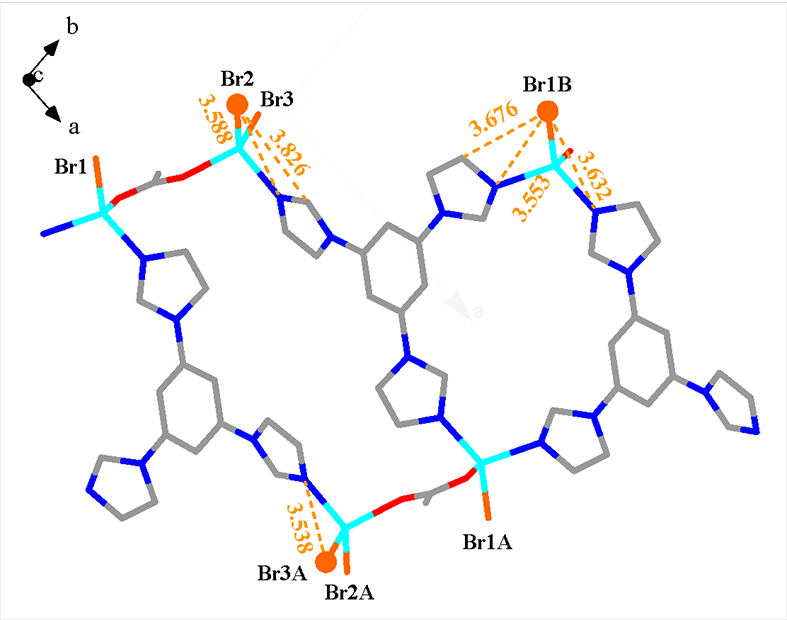


**Supplement Figure S7** Distances between n electron donors and tib moieties in compound QDU-21b.


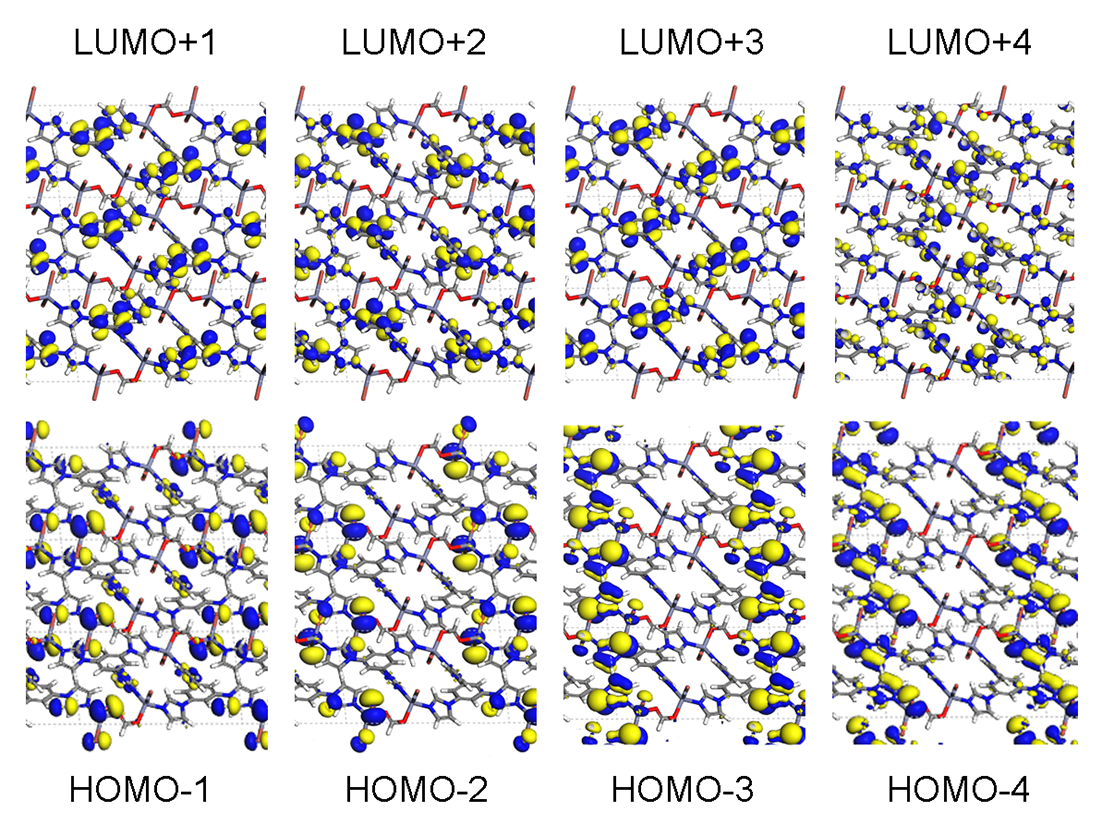


**Supplement Figure S8** Calculated HOMOs and LUMOs for QDU-21a.


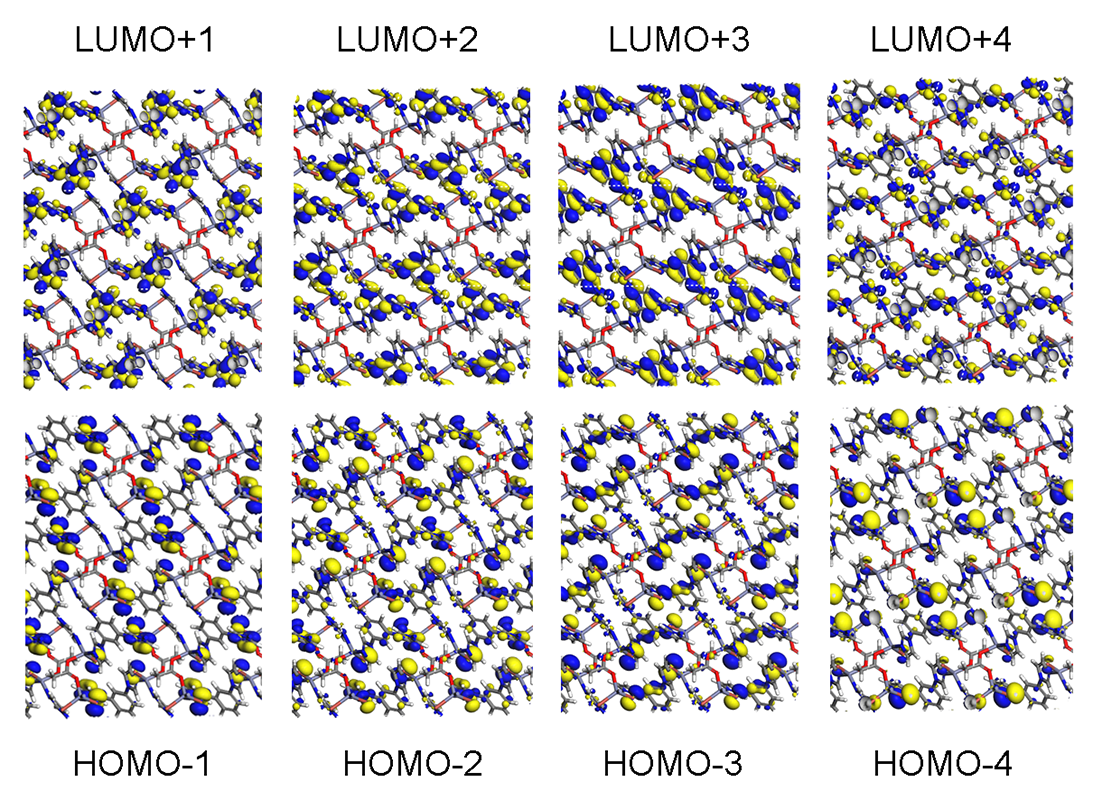


**Supplement Figure S9** Calculated HOMOs and LUMOs for QDU-21b.

**Supplement Table S1**. Crystallographic data for compounds QDU-21a and QDU-21b.

|  | **QDU-21a** | **QDU-21b** |
| --- | --- | --- |
| Formula | C16H13Br3N6O2Zn2 | C17H15Br3N6O2Zn2 |
| Fw | 691.79 | 705.82 |
| Crystal system | Triclinic | Triclinic |
| Space group | *P-1* | *P-1* |
| *a*/Å | 7.6363(8) | 9.3988(9) |
| *b*/Å | 9.6704(9) | 11.2030(10) |
| *c*/Å | 16.0119(14) | 11.4722(12) |
| *α*/° | 80.428(8) | 105.503(9) |
| *β*/° | 78.318(9) | 102.950(9) |
| *γ*/° | 67.690(10) | 91.019(7) |
| V/Å3 | 1066.02(19) | 1130.5(2) |
| *Z* | 2 | 2 |
| Dcalcd/g·cm-3 | 2.155 | 2.073 |
| *μ*(Mo-Kα)/mm-1 | 7.898 | 7.449 |
| F (000) | 664 | 680 |
| total reflns | 5681 | 5807 |
| unique reflns | 3758 | 3992 |
| *R*int | 0.0390 | 0.0339 |
| Final *R* indices [*I*>2σ(*I*)] | *R*1 = 0.0659  w*R*2 = 0.1894 | *R*1 = 0.0436  w*R*2 = 0.0784 |
| *R*1, *wR*2 (all data) | *R*1 = 0.1022  w*R*2 = 0.2139 | *R*1 = 0.0752  w*R*2 = 0.0895 |
| GOF on *F2* | 1.116 | 1.008 |

**Supplement Table S2**. Selected bond lengths (Å) and angles (o) for QDU-21a.

| Br(1)-Zn(1) Br(2)-Zn(2) Br(3)-Zn(2)  N(1)-Zn(1) N(3)-Zn(2)#1  C(16)-O(1)-Zn(2) C(16)-O(2)-Zn(1)  O(2)-Zn(1)-N(1) O(2)-Zn(1)-N(5)#2 N(1)-Zn(1)-N(5)#2 O(2)-Zn(1)-Br(1) N(1)-Zn(1)-Br(1) | 2.3825(15)  2.3558(19)  2.397(2)  1.995(8)  2.001(9)  125.7(7)  119.4(8)  113.4(3)  101.8(3)  113.4(3)  112.2(2)  105.0(2) | N(5)-Zn(1)#2 O(1)-Zn(2) O(2)-Zn(1)  C(16)-O(2) C(16)-O(1)  N(5)#2-Zn(1)-Br(1) N(3)#1-Zn(2)-O(1) N(3)#1-Zn(2)-Br(2) O(1)-Zn(2)-Br(2) N(3)#1-Zn(2)-Br(3) O(1)-Zn(2)-Br(3) Br(2)-Zn(2)-Br(3) | 1.996(8)  2.004(7)  1.971(7)  1.219(13)  1.237(14)  111.3(3)  103.2(3)  114.1(3)  105.8(3)  110.2(3)  111.0(2)  112.13(7) |
| --- | --- | --- | --- |

Symmetry transformations used to generate equivalent atoms: #1: -x+2, -y+1, -z; #2: -x+1, -y+1, -z+1.

**Supplement Table S3**. Selected bond lengths (Å) and angles (o) for QDU-21b.

| N(6)-Zn(2)#2  Zn(1)-O(2)  Zn(1)-N(1) Zn(1)-Br(1) Br(3)-Zn(2)  O(2)-Zn(1)-N(4)#1 O(2)-Zn(1)-N(1) N(4)#1-Zn(1)-N(1) O(2)-Zn(1)-Br(1) N(4)#1-Zn(1)-Br(1) N(1)-Zn(1)-Br(1) O(1)-Zn(2)-N(6)#3 | 2.012(5)  1.963(4)  2.038(5)  2.3427(11)  2.3941(9)  106.2(2)  93.69(18)  115.20(19)  118.98(14)  113.27(15)  108.25(15)  102.6(2) | Zn(2)-O(1) Zn(2)-Br(2)  O(2)-C(16) O(1)-C(16)  O(1)-Zn(2)-Br(2) N(6)#3-Zn(2)-Br(2) O(1)-Zn(2)-Br(3) N(6)#3-Zn(2)-Br(3) Br(2)-Zn(2)-Br(3)  C(16)-O(2)-Zn(1) C(16)-O(1)-Zn(2) | 1.974(4)  2.3412(12)  1.260(7)  1.233(7)  106.83(14)  110.87(15)  112.66(12)  106.59(15)  116.45(4)  124.9(4)  139.8(4) |
| --- | --- | --- | --- |

Symmetry transformations used to generate equivalent atoms: #1: -x+2, -y, -z+2; #2: x-1, y-1, z-1; #3: x+1, y+1, z+1.

**Supplement Table S4** Quantum efficiencies of QDU-21a and QDU-21b with different excitation wavelengths in crystalline powder under ambient conditions.

| Wavelength  (nm) | QE (%) | |
| --- | --- | --- |
| **QDU-21a** | **QDU-21b** |
| 280 | 6.9 | 5.5 |
| 300 | 4.7 | 4.1 |
| 320 | 11.3 | 8.9 |
| 340 | 13.8 | 10.1 |
| 360 | 12.5 | 10.9 |

**Supplement Table S5** Phosphorescence lifetimes of QDU-21bcrystalline powder under ambient conditions*.

| Wavelength  (nm) | τ1  (ms) | A1  (%) | τ2  (ms) | A2  (%) | τ3  (ms) | A3  (%) | <τ>  (ms) | χ² |
| --- | --- | --- | --- | --- | --- | --- | --- | --- |
| 280-490 | 4.2 | 28 | 15 | 36 | 58 | 36 | 27.4 | 1.30 |
| 310-510 | 3.6 | 19 | 18.6 | 46 | 71.2 | 35 | 34.2 | 1.29 |
| 340-525 | 4.3 | 12 | 19.4 | 37 | 63.7 | 51 | 40.3 | 1.29 |
| 370-540 | 4.1 | 18 | 19.1 | 44 | 72.6 | 38 | 36.5 | 1.29 |
| 400-555 | 5.3 | 24 | 21.3 | 44 | 80.7 | 32 | 30.5 | 1.27 |
| 430-570 | 6.0 | 40 | 39.6 | 60 |  |  | 26.1 | 1.18 |
| 460-590 | 1.6 | 36 | 17.1 | 64 |  |  | 11.5 | 1.25 |

*Determined from the fitting function of I(t) = A1e‐t/τ1+ A2e‐t/τ2+ A3e‐t/τ3 according to the phosphorescence decay curves.

**Supplement Table S6** Distance (Å) between ring centroids in the two compounds.

| QDU-21a | | QDU-21b | |
| --- | --- | --- | --- |
| Cg(1) - Cg(2) #1  Cg(1) - Cg(3) #2  Cg(2) - Cg(2) #3  Cg(2)- Cg(2) #4  Cg(2) - Cg(4) #3  Cg(3) - Cg(1) #5  Cg(3) - Cg(3) #6  Cg(3) - Cg(4) #5  Cg(4) - Cg(1) #5  Cg(4) - Cg(2) #3  Cg(4) - Cg(3) #2 | 5.314(6)  4.175(6)  4.305(8)  5.496(8)  5.258(7)  4.174(6)  4.073(6)  5.976(6)  4.960(6)  5.257(7)  5.977(6) | Cg(1) - Cg(1) #1*  Cg(1) - Cg(3) #2*  Cg(1) - Cg(4) #1*  Cg(2) - Cg(2) #3*  Cg(2) - Cg(3) #4*  Cg(3) - Cg(1) #2*  Cg(3) - Cg(2) #4*  Cg(3) - Cg(4) #2*  Cg(4) - Cg(1) #1*  Cg(4) - Cg(3) #2*  Cg(4) - Cg(4) #2* | 3.685(4)  4.445(3)  4.922(3)  5.136(4)  4.902(3)  4.445(3)  4.903(3)  4.424(3)  4.922(3)  4.424(3)  5.740(3) |

Symmetry transformations used to generate equivalent rings: #1: 2-x, 1-y, -z; #2: 1+x, y, z; #3: 1-x, 1-y, -z; #4: 2-x, -y, -z; #5: -1+x, y, z; #6: 1-x, -y, 1-z; #1*: 1-x, -y, 2-z; #2*: 1-x, -y, 1-z; #3*: 2-x, -1-y, 1-z; #4*: 1-x, -1-y, 1-z.
